# Supplementary material for: Isostructural cocrystals of metaxalone with improved dissolution characteristics
Source: Royal Society of Chemistry journal article supplement (doi:10.1039/d1ra05959a), 2021-01-01
Supplement: d1ra05959a1.pdf [file d1ra05959a1.pdf]

## Supporting Information

### Isostructural Cocrystals of Metaxalone with Improved Dissolution Characteristics

Sunil Kumar Gohel,<sup>a</sup> Vasanthi Palanisamy,<sup>b</sup> Palash Sanphui,<sup>b\*</sup> Muthuramalingam Prakash,<sup>b</sup> Girij Pal Singh<sup>a</sup> and Vladimir Chernyshev<sup>c,d\*</sup>

<sup>a</sup>Lupin Limited, Lupin Research Park; Pune-412115, Maharashtra, India.

<sup>b</sup>Department of Chemistry, Faculty of Engineering and Technology, SRM Institute of Science and Technology, Chennai, Tamil Nadu 603203, India.

<sup>c</sup>Department of Chemistry, M. V. Lomonosov Moscow State University, 1-3 Leninskie Gory, Moscow 119991, Russian Federation.

<sup>d</sup>A. N. Frumkin Institute of Physical Chemistry and Electrochemistry RAS, 31 Leninsky Prospect, Moscow 119071, Russian Federation.

\*Correspondence E-mail: palashi@srmist.edu.in; vladimir@struct.chem.msu.ru

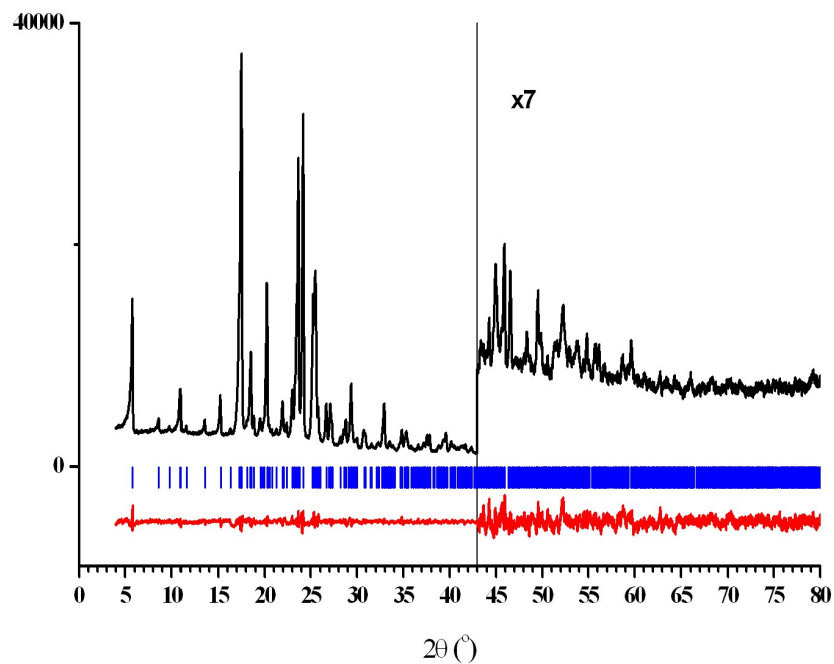

(a)

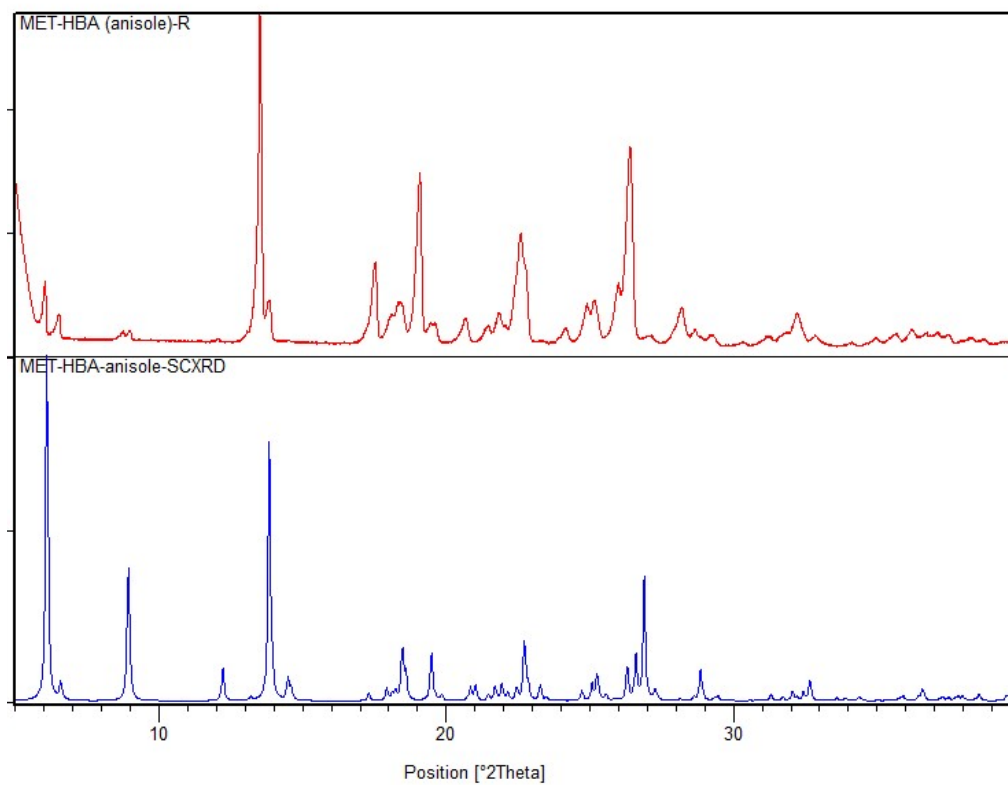

(b)

**Fig. S1.** (a) The final Rietveld plot for MET-NAM, show the experimental and difference diffraction profiles as black (top) and red (bottom) curves, respectively. The vertical blue bars correspond to the calculated positions of the Bragg peaks. (b) XRD pattern comparison between MET-HBA (aniso)

solvate with its simulated pattern from crystal structure, which suggests except a few diffraction peaks, most of the patterns are matched well.

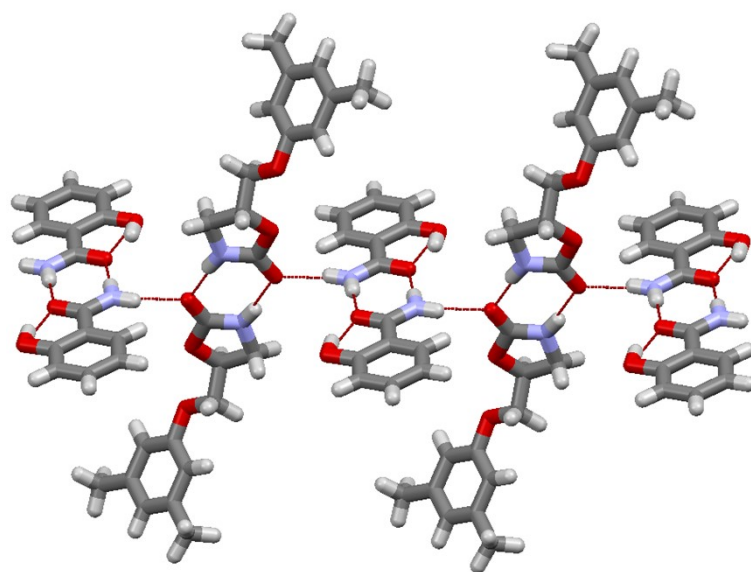

(a)

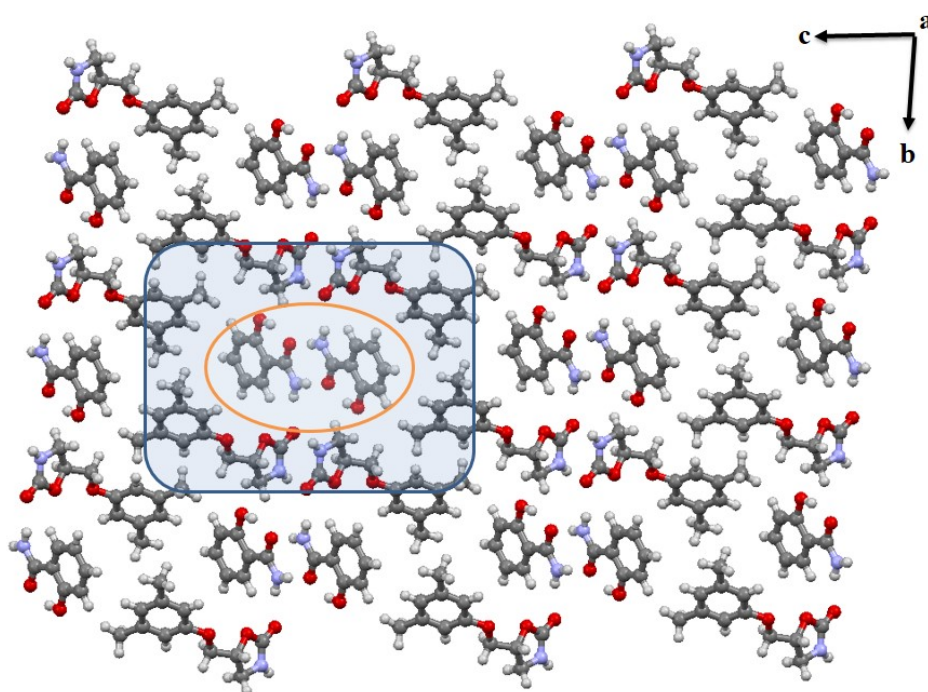

(b)

**Fig. S2.** (a) Hydrogen bonding pattern of MET-SAM cocrystal. (b) 3D packing viewed down the crystallography *a* axis.

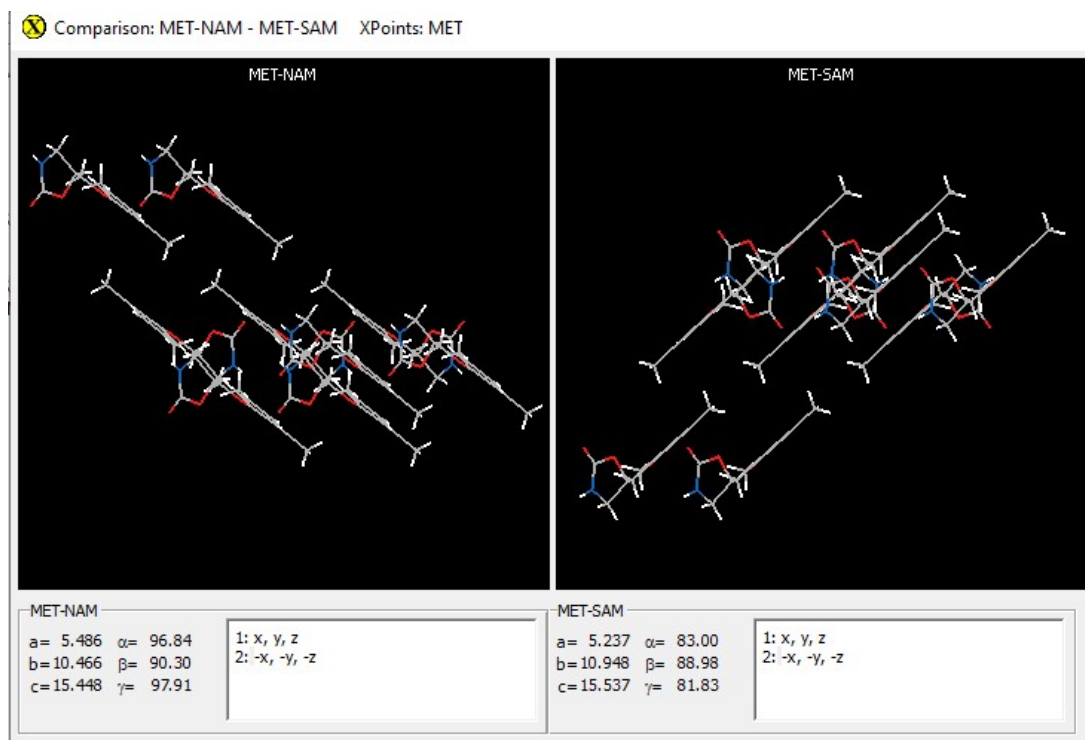

**Fig. S3.** XPac derived 2D supramolecular constructs of MET–NAM and MET–SAM cocrystals.

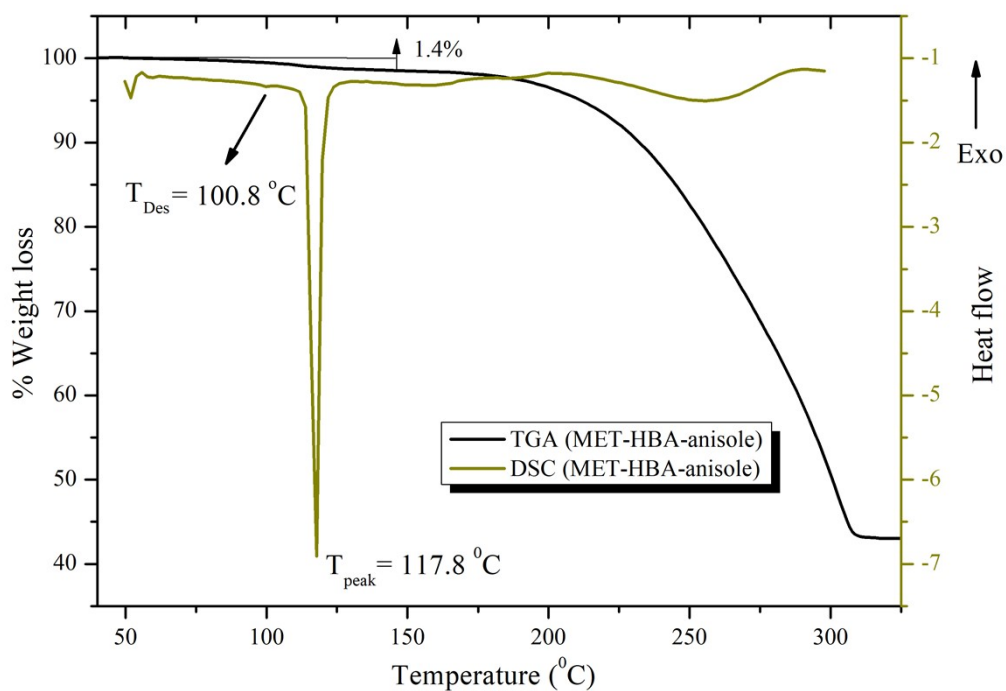

**Fig. S4.** DSC and TGA comparison of MET–HBA (anisole) solvate after storage for 3 months at ambient conditions indicates the gradual loss of anisole from the cocrystal lattice.

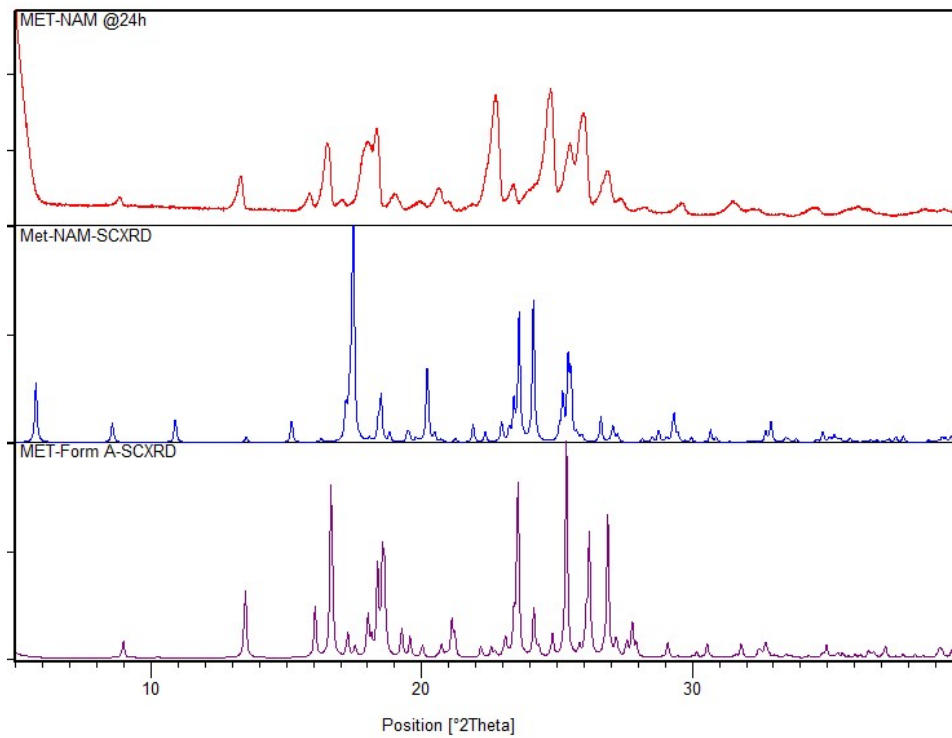

(a)

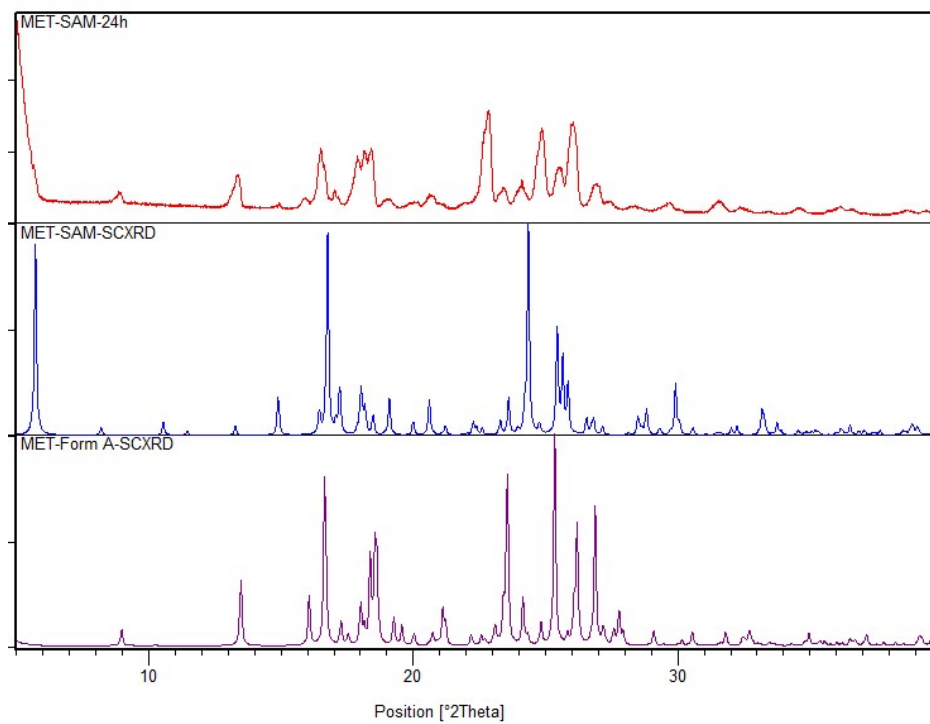

(b)

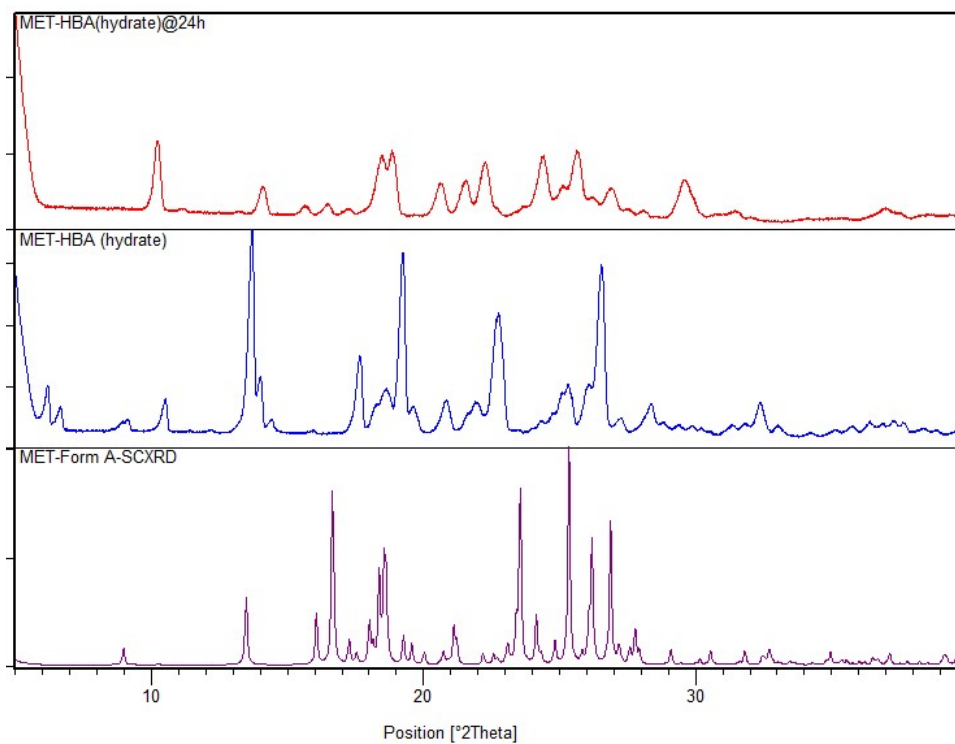

(c)

**Fig. S5.** XRD data comparison of (a) MET–NAM, (b) MET–SAM, and (c) MET–HBA (hydrate) with their calculated X-ray patterns and MET (Form I) that confirmed MET–NAM cocrystal transformed to the drug only, whereas MET–SAM and MET–HBA (hydrate) partially transformed to the drug alone.
